# Supplementary material
Source: publisher site journal article supplement (https://www.dovepress.com/article/409037)
Supplement: Supplementary file 1 [file get_supplementary_file.php]

**Supplementary File**

**Molecular Epidemiology and Characterization of Multidrug-Resistant MRSA ST398 and ST239 in Himachal Pradesh, India**

Table-1: Primers used for *S. aureus* MLST typing as highlighted by Enright et al.,2000

|  | | |
| --- | --- | --- |
| **Gene** | **Primer** | **Sequence (5′-3′)** |
| Carbamate kinase (*arcC*) | *arcC*-Up | TTGATTCACCAGCGCGTATTGTC |
| *arcC*-Dn | AGGTATCTGCTTCAATCAGCG |
| Shikimate dehydrogenase (*aroE*) | *aroE*-Up | ATCGGAAATCCTATTTCACATTC |
| *aroE*-Dn | GGTGTTGTATTAATAACGATATC |
| Glycerol kinase (*glpF*) | *glpF*-Up | CTAGGAACTGCAATCTTAATCC |
| *glpF*-Dn | TGGTAAAATCGCATGTCCAATTC |
| Guanylate kinase (*gmk*) | *gmk*-Up | ATCGTTTTATCGGGACCATC |
| *gmk*-Dn | TCATTAACTACAACGTAATCGTA |
| Phosphate acetyltransferase (*pta*) | *pta*-Up | GTTAAAATCGTATTACCTGAAGG |
| *pta*-Dn | GACCCTTTTGTTGAAAAGCTTAA |
| Triosephosphate isomerase (*tpi*) | *tpi*-Up | TCGTTCATTCTGAACGTCGTGAA |
| *tpi*-Dn | TTTGCACCTTCTAACAATTGTAC |
| Acetyl coenzyme A acetyltransferase (*yqiL*) | *yqiL*-Up | CAGCATACAGGACACCTATTGGC |
| *yqiL*-Dn | CGTTGAGGAATCGATACTGGAAC |

Reference: Enright MC, Day NP, Davies CE, Peacock SJ, Spratt BG. Multilocus sequence typing for characterization of methicillin-resistant and methicillin-susceptible clones of *Staphylococcus aureus*. *J Clin Microbiol*. 2000;38:1008-1015.
